# Supplementary material
Source: PubMed Central journal article supplement (PMC5106186)
Supplement: NIHMS810823-supplement-SI.pdf [file NIHMS810823-supplement-SI.pdf]

**Protein resistance efficacy of PEO-silane amphiphiles:  
Dependence on PEO-segment length and concentration in silicone**

Marc A. Rufin,<sup>a</sup> Mikayla E. Barry,<sup>a</sup> Paige A. Adair,<sup>a</sup> Melissa L. Hawkins,<sup>a</sup>  
Jeffery E. Raymond,<sup>b</sup> and Melissa A. Grunlan<sup>\*,a,c</sup>

<sup>a</sup>Department of Biomedical Engineering, <sup>b</sup>Department of Chemistry,  
and <sup>c</sup>Department of Materials Science and Engineering  
Texas A&M University, College Station, TX 77843-3120

\*E-mail: mgrunlan@tamu.edu

**Table S1.** Static water contact angles (°) measured on silicone bulk-modified with  $n = 3$ . Each value is the average and standard deviation of three water droplets measured on the same film.

|               | <u>Unmodified</u> | <u>5 <math>\mu\text{mol}</math></u> | <u>10 <math>\mu\text{mol}</math></u> | <u>25 <math>\mu\text{mol}</math></u> | <u>50 <math>\mu\text{mol}</math></u> | <u>100 <math>\mu\text{mol}</math></u> |
|---------------|-------------------|-------------------------------------|--------------------------------------|--------------------------------------|--------------------------------------|---------------------------------------|
| <b>t=0</b>    | 115.7 $\pm$ 0.7   | 115.1 $\pm$ 1.2                     | 112.6 $\pm$ 0.6                      | 114.4 $\pm$ 0.5                      | 116.5 $\pm$ 0.7                      | 114.1 $\pm$ 0.8                       |
| <b>15 sec</b> | 115.7 $\pm$ 0.5   | 115.0 $\pm$ 0.9                     | 112.7 $\pm$ 0.4                      | 101.7 $\pm$ 0.5                      | 92.3 $\pm$ 0.4                       | 84.4 $\pm$ 0.7                        |
| <b>30 sec</b> | 115.5 $\pm$ 0.5   | 115.0 $\pm$ 1.0                     | 106.1 $\pm$ 0.4                      | 96.1 $\pm$ 0.7                       | 89.8 $\pm$ 0.5                       | 82.7 $\pm$ 0.8                        |
| <b>1 min</b>  | 115.2 $\pm$ 0.5   | 108.8 $\pm$ 0.7                     | 100.7 $\pm$ 0.4                      | 93.1 $\pm$ 0.6                       | 88.3 $\pm$ 0.4                       | 81.2 $\pm$ 0.7                        |
| <b>2 min</b>  | 113.9 $\pm$ 0.7   | 104.9 $\pm$ 0.6                     | 97.3 $\pm$ 0.2                       | 91.2 $\pm$ 0.6                       | 86.7 $\pm$ 0.4                       | 79.6 $\pm$ 0.8                        |
| <b>3 min</b>  | 112.6 $\pm$ 0.4   | 102.6 $\pm$ 0.6                     | 95.6 $\pm$ 0.4                       | 90.1 $\pm$ 0.7                       | 85.6 $\pm$ 0.3                       | 78.4 $\pm$ 0.8                        |
| <b>4 min</b>  | 111.9 $\pm$ 0.4   | 101.1 $\pm$ 0.7                     | 94.5 $\pm$ 0.4                       | 89.1 $\pm$ 0.7                       | 84.6 $\pm$ 0.3                       | 77.3 $\pm$ 0.8                        |
| <b>5 min</b>  | 109.7 $\pm$ 0.7   | 100.1 $\pm$ 0.7                     | 93.5 $\pm$ 0.5                       | 88.2 $\pm$ 0.7                       | 83.7 $\pm$ 0.3                       | 76.2 $\pm$ 0.8                        |

**Table S2.** Static water contact angles (°) measured on silicone bulk-modified with  $n = 8$ . Each value is the average and standard deviation of three water droplets measured on the same film.

|               | <u>Unmodified</u> | <u>5 <math>\mu\text{mol}</math></u> | <u>10 <math>\mu\text{mol}</math></u> | <u>25 <math>\mu\text{mol}</math></u> | <u>50 <math>\mu\text{mol}</math></u> | <u>100 <math>\mu\text{mol}</math></u> |
|---------------|-------------------|-------------------------------------|--------------------------------------|--------------------------------------|--------------------------------------|---------------------------------------|
| <b>t=0</b>    | 115.7 $\pm$ 0.7   | 116.5 $\pm$ 2.4                     | 117.1 $\pm$ 0.5                      | 115.8 $\pm$ 0.2                      | 118.5 $\pm$ 1.8                      | 119.8 $\pm$ 0.8                       |
| <b>15 sec</b> | 115.7 $\pm$ 0.5   | 115.0 $\pm$ 1.1                     | 117.1 $\pm$ 0.6                      | 97.8 $\pm$ 2.0                       | 70.9 $\pm$ 2.0                       | 45.8 $\pm$ 0.6                        |
| <b>30 sec</b> | 115.5 $\pm$ 0.5   | 115.0 $\pm$ 1.1                     | 111.2 $\pm$ 0.4                      | 77.7 $\pm$ 0.5                       | 53.7 $\pm$ 1.2                       | 38.0 $\pm$ 0.6                        |
| <b>1 min</b>  | 115.2 $\pm$ 0.5   | 111.0 $\pm$ 1.0                     | 102.5 $\pm$ 0.6                      | 61.8 $\pm$ 1.0                       | 45.8 $\pm$ 1.2                       | 32.8 $\pm$ 0.2                        |
| <b>2 min</b>  | 113.9 $\pm$ 0.7   | 106.8 $\pm$ 0.7                     | 89.7 $\pm$ 1.7                       | 50.0 $\pm$ 0.8                       | 39.3 $\pm$ 0.8                       | 29.5 $\pm$ 0.3                        |
| <b>3 min</b>  | 112.6 $\pm$ 0.4   | 103.7 $\pm$ 0.5                     | 80.4 $\pm$ 0.4                       | 44.4 $\pm$ 1.0                       | 35.3 $\pm$ 0.6                       | 27.5 $\pm$ 0.3                        |
| <b>4 min</b>  | 111.9 $\pm$ 0.4   | 100.6 $\pm$ 0.6                     | 75.4 $\pm$ 0.5                       | 40.7 $\pm$ 0.8                       | 32.6 $\pm$ 0.3                       | 26.1 $\pm$ 0.3                        |
| <b>5 min</b>  | 109.7 $\pm$ 0.7   | 98.1 $\pm$ 0.7                      | 71.6 $\pm$ 0.4                       | 37.7 $\pm$ 0.6                       | 30.2 $\pm$ 0.4                       | 24.9 $\pm$ 0.3                        |

**Table S3.** Static water contact angles (°) measured on silicone bulk-modified with  $n = 16$ . Each value is the average and standard deviation of three water droplets measured on the same film.

|               | <u>Unmodified</u> | <u>5 <math>\mu\text{mol}</math></u> | <u>10 <math>\mu\text{mol}</math></u> | <u>25 <math>\mu\text{mol}</math></u> | <u>50 <math>\mu\text{mol}</math></u> | <u>100 <math>\mu\text{mol}</math></u> |
|---------------|-------------------|-------------------------------------|--------------------------------------|--------------------------------------|--------------------------------------|---------------------------------------|
| <b>t=0</b>    | 115.7 $\pm$ 0.7   | 115.8 $\pm$ 0.4                     | 117.1 $\pm$ 0.7                      | 114.8 $\pm$ 1.1                      | 115.5 $\pm$ 0.9                      | 114.7 $\pm$ 2.2                       |
| <b>15 sec</b> | 115.7 $\pm$ 0.5   | 115.7 $\pm$ 0.4                     | 117.0 $\pm$ 0.9                      | 114.8 $\pm$ 0.9                      | 110.7 $\pm$ 0.7                      | 97.9 $\pm$ 9.9                        |
| <b>30 sec</b> | 115.5 $\pm$ 0.5   | 115.5 $\pm$ 0.4                     | 116.9 $\pm$ 1.0                      | 109.3 $\pm$ 1.0                      | 103.2 $\pm$ 3.5                      | 90.7 $\pm$ 8.8                        |
| <b>1 min</b>  | 115.2 $\pm$ 0.5   | 115.3 $\pm$ 0.5                     | 112.2 $\pm$ 0.7                      | 104.8 $\pm$ 0.6                      | 93.9 $\pm$ 4.9                       | 75.9 $\pm$ 4.8                        |
| <b>2 min</b>  | 113.9 $\pm$ 0.7   | 109.8 $\pm$ 0.3                     | 109.1 $\pm$ 0.6                      | 97.9 $\pm$ 0.5                       | 75.5 $\pm$ 2.8                       | 58.8 $\pm$ 1.2                        |
| <b>3 min</b>  | 112.6 $\pm$ 0.4   | 108.3 $\pm$ 0.5                     | 107.0 $\pm$ 0.7                      | 90.4 $\pm$ 0.5                       | 64.9 $\pm$ 1.4                       | 49.3 $\pm$ 2.9                        |
| <b>4 min</b>  | 111.9 $\pm$ 0.4   | 107.2 $\pm$ 0.5                     | 105.2 $\pm$ 0.6                      | 82.7 $\pm$ 0.2                       | 58.7 $\pm$ 0.9                       | 45.1 $\pm$ 1.7                        |
| <b>5 min</b>  | 109.7 $\pm$ 0.7   | 106.1 $\pm$ 0.6                     | 103.4 $\pm$ 0.6                      | 75.8 $\pm$ 0.1                       | 54.4 $\pm$ 0.8                       | 41.8 $\pm$ 1.0                        |

**Table S4.** Fluorescence intensity measured on unmodified and bulk-modified silicone films before (absolute) and after normalizing all values to the signal measured on unmodified silicone.

|                                       |               | <b>Absolute</b>      | <b>Normalized</b> |
|---------------------------------------|---------------|----------------------|-------------------|
| <b>Unmodified</b>                     |               | 1769.98 $\pm$ 102.20 | 100.00 $\pm$ 5.77 |
| <b>5 <math>\mu\text{mol}</math></b>   | <b>n = 3</b>  | 1465.25 $\pm$ 51.25  | 82.78 $\pm$ 2.90  |
|                                       | <b>n = 8</b>  | 698.70 $\pm$ 44.96   | 39.47 $\pm$ 2.54  |
|                                       | <b>n = 16</b> | 83.62 $\pm$ 9.10     | 4.72 $\pm$ 0.51   |
| <b>10 <math>\mu\text{mol}</math></b>  | <b>n = 3</b>  | 1243.34 $\pm$ 80.01  | 70.25 $\pm$ 4.52  |
|                                       | <b>n = 8</b>  | 3.65 $\pm$ 0.89      | 0.21 $\pm$ 0.05   |
|                                       | <b>n = 16</b> | 24.43 $\pm$ 9.25     | 1.38 $\pm$ 0.52   |
| <b>25 <math>\mu\text{mol}</math></b>  | <b>n = 3</b>  | 1726.23 $\pm$ 121.68 | 97.53 $\pm$ 6.87  |
|                                       | <b>n = 8</b>  | 3.52 $\pm$ 0.24      | 0.20 $\pm$ 0.01   |
|                                       | <b>n = 16</b> | 8.52 $\pm$ 2.01      | 0.48 $\pm$ 0.11   |
| <b>50 <math>\mu\text{mol}</math></b>  | <b>n = 3</b>  | 1984.62 $\pm$ 102.27 | 112.13 $\pm$ 5.78 |
|                                       | <b>n = 8</b>  | 5.06 $\pm$ 1.25      | 0.29 $\pm$ 0.07   |
|                                       | <b>n = 16</b> | 3.27 $\pm$ 0.99      | 0.18 $\pm$ 0.06   |
| <b>100 <math>\mu\text{mol}</math></b> | <b>n = 3</b>  | 1603.22 $\pm$ 98.78  | 90.58 $\pm$ 5.58  |
|                                       | <b>n = 8</b>  | 2.31 $\pm$ 0.27      | 0.13 $\pm$ 0.01   |
|                                       | <b>n = 16</b> | 4.26 $\pm$ 0.67      | 0.24 $\pm$ 0.04   |
